# Supplementary material
Source: PubMed Central journal article supplement (PMC3700265)
Supplement: JVI.03431-12_zjv999097807so1.pdf [file JVI.03431-12_zjv999097807so1.pdf]

| Gene     | IFN $\lambda$ 1 |       | IFN $\lambda$ 2 |       | IFN $\alpha$ |        |
|----------|-----------------|-------|-----------------|-------|--------------|--------|
|          | Average         | SD    | Average         | SD    | Average      | SD     |
| ADAR     | 2.6             | 1.0   | 2.7             | 2.7   | 4.3          | 2.8    |
| ANXA11   | 1.1             | 0.1   | 1.3             | 0.3   | 1.0          | 0.4    |
| ARL5A    | 0.9             | 0.1   | 0.9             | 0.1   | 0.9          | 0.1    |
| ARL5B    | 1.3             | 0.1   | 1.2             | 0.5   | 2.6          | 0.7    |
| ATF5     | 1.1             | 0.4   | 1.2             | 0.8   | 1.6          | 1.2    |
| BAG3     | 0.9             | 0.1   | 1.0             | 0.3   | 0.8          | 0.2    |
| BST2     | 5.5             | 0.8   | 8.2             | 3.9   | 16.9         | 11.4   |
| CASP1    | 2.3             | 1.8   | 2.5             | 2.1   | 4.6          | 4.0    |
| CAV1     | 0.8             | 0.2   | 1.1             | 0.2   | 0.7          | 0.4    |
| CBFB     | 1.1             | 0.3   | 1.1             | 0.6   | 1.0          | 0.7    |
| CD70     | n.d.            | -     | n.d.            | -     | n.d.         | -      |
| CDKN1B   | 1.1             | 0.3   | 1.0             | 0.6   | 1.2          | 0.7    |
| CNP      | 3.2             | 1.9   | 4.5             | 5.7   | 6.9          | 4.5    |
| COL16A1  | 1.0             | 0.6   | 1.6             | 1.0   | 1.1          | 0.7    |
| CXCL10   | 63.7            | 87.7  | 56.2            | 73.4  | 821.9        | 1149.7 |
| DAD1     | 0.9             | 0.1   | 1.0             | 0.2   | 0.9          | 0.3    |
| DIABLO   | 1.2             | 0.5   | 1.5             | 1.2   | 1.2          | 0.9    |
| DNAJB2   | 1.0             | 0.2   | 1.3             | 0.5   | 0.8          | 0.2    |
| PKR      | 4.3             | 1.5   | 4.3             | 2.1   | 9.6          | 3.0    |
| GBP1     | 10.9            | 11.3  | 10.1            | 10.9  | 101.8        | 133.5  |
| GBP2     | 2.4             | 2.3   | 2.4             | 2.1   | 8.9          | 11.3   |
| GCH1     | 1.3             | 0.5   | 1.4             | 1.1   | 1.8          | 1.2    |
| HLA-A    | 1.2             | 0.3   | 1.4             | 0.6   | 1.4          | 0.6    |
| HLA-B    | 1.6             | 0.7   | 2.1             | 2.2   | 2.4          | 1.7    |
| HLA-C    | 1.4             | 0.5   | 2.0             | 1.2   | 2.6          | 0.9    |
| HLA-DOA  | 1.1             | 0.2   | 1.4             | 1.2   | 1.2          | 0.9    |
| HLA-DQA1 | 1.3             | 0.3   | 1.4             | 0.1   | 1.2          | 1.0    |
| HLA-E    | 1.6             | 0.7   | 2.3             | 2.1   | 2.3          | 1.6    |
| HLA-F    | 2.3             | 1.2   | 3.3             | 2.9   | 4.3          | 2.1    |
| HLA-G    | 1.6             | 0.7   | 1.6             | 0.3   | 2.0          | 0.3    |
| HOXB2    | 1.1             | 0.5   | 1.4             | 1.0   | 1.1          | 1.2    |
| HSPA1L   | 1.4             | 0.8   | 1.7             | 1.5   | 1.5          | 1.0    |
| IFI16    | 5.4             | 3.1   | 5.8             | 2.5   | 11.8         | 0.9    |
| IFI27    | 4.3             | 1.4   | 4.9             | 1.6   | 11.2         | 3.0    |
| IFI30    | 1.6             | 0.5   | 1.7             | 1.1   | 2.4          | 1.8    |
| IFI6     | 4.5             | 1.7   | 4.7             | 2.5   | 8.3          | 4.2    |
| IFIT1    | 34.3            | 16.3  | 32.1            | 19.5  | 100.0        | 35.5   |
| IFIT3    | 42.0            | 35.4  | 42.3            | 30.6  | 130.3        | 33.0   |
| IFITM1   | 6.6             | 3.4   | 8.2             | 2.5   | 12.9         | 7.4    |
| IFITM2   | 2.3             | 1.7   | 2.8             | 2.2   | 5.0          | 4.8    |
| IFNA1    | n.d.            | -     | n.d.            | -     | n.d.         | -      |
| IFNA2    | n.d.            | -     | n.d.            | -     | n.d.         | -      |
| IFNA4    | n.d.            | -     | n.d.            | -     | n.d.         | -      |
| IFNAR1   | 0.8             | 0.2   | 0.7             | 0.3   | 0.6          | 0.3    |
| IFNAR2   | 1.0             | 0.1   | 1.0             | 0.2   | 1.1          | 0.2    |
| IFNB1    | n.d.            | -     | n.d.            | -     | n.d.         | -      |
| IRF1     | 3.3             | 2.5   | 5.1             | 6.9   | 8.9          | 7.1    |
| IRF2     | 1.3             | 0.1   | 1.5             | 0.5   | 2.9          | 1.4    |
| IRF3     | 1.0             | 0.1   | 1.2             | 0.1   | 0.9          | 0.0    |
| IRF5     | 1.6             | 1.2   | 1.9             | 2.1   | 1.1          | 0.9    |
| IRF7     | 10.1            | 3.7   | 12.9            | 12.5  | 20.6         | 13.4   |
| IRF9     | 7.7             | 7.0   | 8.0             | 8.0   | 6.7          | 4.6    |
| ISG15    | 58.5            | 28.3  | 80.7            | 48.6  | 300.4        | 123.4  |
| ISG20    | 5.0             | 2.5   | 5.9             | 2.1   | 22.0         | 5.0    |
| ITIH2    | 0.8             | 0.5   | 0.9             | 0.7   | 0.5          | 0.3    |
| MAL      | n.d.            | -     | n.d.            | -     | n.d.         | -      |
| MDA5     | 6.1             | 2.9   | 5.1             | 1.9   | 22.4         | 9.9    |
| MET      | 1.2             | 0.5   | 1.1             | 0.4   | 1.3          | 0.5    |
| MNT      | 0.7             | 0.3   | 0.8             | 0.5   | 0.5          | 0.4    |
| MX1      | 40.2            | 13.6  | 48.7            | 35.9  | 103.9        | 52.7   |
| MX2      | 164.7           | 132.7 | 156.3           | 127.5 | 489.0        | 479.5  |
| MYD88    | 3.6             | 1.1   | 4.1             | 2.8   | 8.8          | 4.4    |
| NMI      | 3.1             | 2.3   | 3.0             | 2.4   | 12.7         | 13.1   |
| NPEPPS   | 1.0             | 0.2   | 1.1             | 0.8   | 1.3          | 0.9    |
| NRG1     | 0.9             | 0.2   | 0.8             | 0.2   | 0.8          | 0.2    |
| OAS1     | 26.0            | 14.6  | 36.0            | 33.3  | 72.6         | 43.2   |
| OAS2     | 61.5            | 29.6  | 66.5            | 39.3  | 191.2        | 49.4   |
| PML      | 4.5             | 1.7   | 5.9             | 6.0   | 11.2         | 7.1    |
| PRKCZ    | 1.0             | 0.2   | 1.1             | 0.4   | 0.8          | 0.6    |
| PRKRA    | 0.8             | 0.3   | 0.7             | 0.4   | 0.6          | 0.5    |
| PSME2    | 1.6             | 0.2   | 1.6             | 0.3   | 2.8          | 0.4    |
| PTTG1    | 0.7             | 0.4   | 0.9             | 0.6   | 0.8          | 0.7    |
| RCBTB1   | 1.0             | 0.1   | 0.9             | 0.1   | 1.3          | 0.3    |
| RIG-I    | 15.9            | 8.0   | 13.9            | 6.6   | 54.7         | 26.3   |
| SAMSN1   | 1.2             | 0.3   | 1.1             | 0.4   | 2.1          | 1.3    |
| SH2D1A   | n.d.            | -     | n.d.            | -     | n.d.         | -      |
| SHB      | 0.9             | 0.3   | 1.1             | 0.6   | 0.7          | 0.7    |
| SHFM1    | 0.9             | 0.1   | 1.0             | 0.3   | 0.7          | 0.2    |

|         |     |     |     |     |      |     |
|---------|-----|-----|-----|-----|------|-----|
| SLC1A2  | 0.9 | 0.3 | 0.6 | 0.2 | 0.6  | 0.2 |
| STAT1   | 7.5 | 2.1 | 8.2 | 5.0 | 16.8 | 8.3 |
| STAT2   | 3.0 | 0.7 | 2.9 | 2.6 | 8.6  | 6.0 |
| TAP1    | 4.1 | 1.2 | 4.1 | 1.8 | 12.9 | 4.2 |
| TLR3    | 4.7 | 1.5 | 4.2 | 1.8 | 19.0 | 9.4 |
| TNFSF10 | 2.3 | 1.0 | 2.2 | 1.3 | 12.6 | 7.9 |
| TRAF3   | 0.8 | 0.3 | 0.9 | 0.4 | 0.8  | 0.6 |
| VEGFA   | 1.4 | 0.7 | 1.5 | 1.4 | 1.5  | 1.0 |

**Table S1.**

Human islets from three donors were treated with IFN $\lambda$ 1 (100 ng/ml), IFN $\lambda$ 2 (100 ng/ml) or IFN $\alpha$  (1000 U/ml) for 6 h. After 6 h mRNA was isolated and the mRNA expression levels of 86 ISGs were measured using real time RT-PCR. The mRNA expression levels were normalized to the expression level of GAPDH (individual genes) or five house keeping genes (genes analysed using PCR array) and compared to untreated control from the same donor. A  $C_t$  value of  $\geq 35$  for any of the indicated genes was considered as below the detection level of the assay and set as not detected (n.d.). The data is presented as fold induction compared to untreated control, mean  $\pm$  S.D. for three separate human islet donors.
